# Supplementary material
Source: PubMed Central journal article supplement (PMC2000261)
Supplement: gut_2007.123729_1.pdf [file gut_2007.123729_1.pdf]

**Supplemental table A.** Clinicopathologic features of the chromosome translocations positive and negative groups

| Factors                  | t(11;18)/ <i>API2-MALT1</i> |                        |                     | <i>IGH</i> involved translocation |                        |                 |
|--------------------------|-----------------------------|------------------------|---------------------|-----------------------------------|------------------------|-----------------|
|                          | Positive<br>(n=18) (%)      | Negative<br>(n=69) (%) | p Value             | Positive<br>(n=4) (%)             | Negative<br>(n=64) (%) | p Value         |
| Age (yr)                 | 16-80                       | 18-80                  |                     | 40-62                             | 16-80                  |                 |
| Mean,                    | 53                          | 59                     | 0.064 <sup>a</sup>  | 53                                | 58                     | NS <sup>a</sup> |
| Gender                   |                             |                        |                     |                                   |                        |                 |
| Male                     | 12 (67)                     | 33 (48)                | NS <sup>b</sup>     | 2 (50)                            | 32 (50)                | NS <sup>b</sup> |
| Female                   | 6 (33)                      | 36 (52)                |                     | 2 (50)                            | 32 (50)                |                 |
| Depth of tumour invasion |                             |                        |                     |                                   |                        |                 |
| Mucosa                   | 7 (39)                      | 28 (41)                | NS <sup>b</sup>     | 2 (50)                            | 26 (41)                | NS <sup>b</sup> |
| Submucosa or beyond      | 11 (61)                     | 41 (59)                |                     | 2 (50)                            | 38 (59)                |                 |
| Clinical stage           |                             |                        |                     |                                   |                        |                 |
| I                        | 15 (83)                     | 44 (64)                | NS <sup>b</sup>     | 3 (75)                            | 42 (66)                | NS <sup>b</sup> |
| II <sub>1</sub> or more  | 3 (17)                      | 25 (36)                |                     | 1 (25)                            | 22 (34)                |                 |
| <i>H pylori</i> status   | (n=16)                      | (n=59)                 |                     | (n=2)                             | (n=57)                 |                 |
| Positive                 | 10 (63)                     | 57 (97)                | <0.001 <sup>b</sup> | 2 (100)                           | 49 (86)                | NS <sup>b</sup> |
| Negative                 | 6 (38)                      | 2 (3)                  |                     | 0                                 | 8 (14)                 |                 |
| Response to eradication  | (n=6)                       | (n=28)                 |                     | (n=2)                             | (n=30)                 |                 |
| Complete remission (CR)  | 1 (17)                      | 19 (68)                | 0.032 <sup>b</sup>  | 1 (50)                            | 16 (53)                | NS <sup>b</sup> |
| Non-CR                   | 5 (83)                      | 9 (32)                 |                     | 1 (50)                            | 14 (47)                |                 |
| Bcl10 nuclear expression | (n=14)                      | (n=66)                 |                     |                                   | (n=58)                 |                 |
| Positive                 | 10 (73)                     | 26 (39)                | 0.029 <sup>b</sup>  | 2 (50)                            | 29 (50)                | NS <sup>b</sup> |
| Negative                 | 4 (27)                      | 40 (61)                |                     | 2 (50)                            | 29 (50)                |                 |

NS, not significant; CR, complete remission. <sup>a</sup>Mann-Whitney *U* test. <sup>b</sup>Fisher's exact probability test.
